# Supplementary material
Source: publisher figshare collection journal article supplement (https://acs.figshare.com/ndownloader/files/4721230)
Supplement: Supplementary file 1 [file 4721230]

AUCO2.SI.FINAL

11/13/2006

## Supporting Information:

### Dynamics of CO<sub>2</sub>-Plasticized Electron Transport in Au Nanoparticle Films: Opposing Effects of Tunneling Distance and Local Site Mobility

Jai-Pil Choi, Melissa M. Coble, Matthew R. Branham, Joseph M. DeSimone, and Royce W.

Murray\*

*Kenan Laboratories of Chemistry, University of North Carolina, Chapel Hill, North Carolina 27599-3290*

**Table S-1.** Rest potential ( $E_R$ ) and Charge-State Composition of Mixed-Valent Au<sub>38</sub> Nanoparticles Prepared by Ce(IV) Oxidation

| $E_R$ (V vs. Ag/Ag <sup>+</sup> ) | Au <sub>38</sub> <sup>0</sup> (%) <sup>a</sup> | Au <sub>38</sub> <sup>1+</sup> (%) <sup>a</sup> |
|-----------------------------------|------------------------------------------------|-------------------------------------------------|
| – 0.472                           | 99                                             | 1                                               |
| – 0.390                           | 78                                             | 22                                              |
| – 0.365                           | 68                                             | 32                                              |
| – 0.352                           | 58                                             | 42                                              |

*a.* Calculated from the Nernst equation:  $E_R - E^{\circ'} = 0.059 \log \frac{[\text{Au}_{38}^{1+}]}{[\text{Au}_{38}^0]}$ , where  $E^{\circ'} = -0.357$

V taken from the half-wave potential of the Au<sub>38</sub><sup>1+/0</sup> couple.

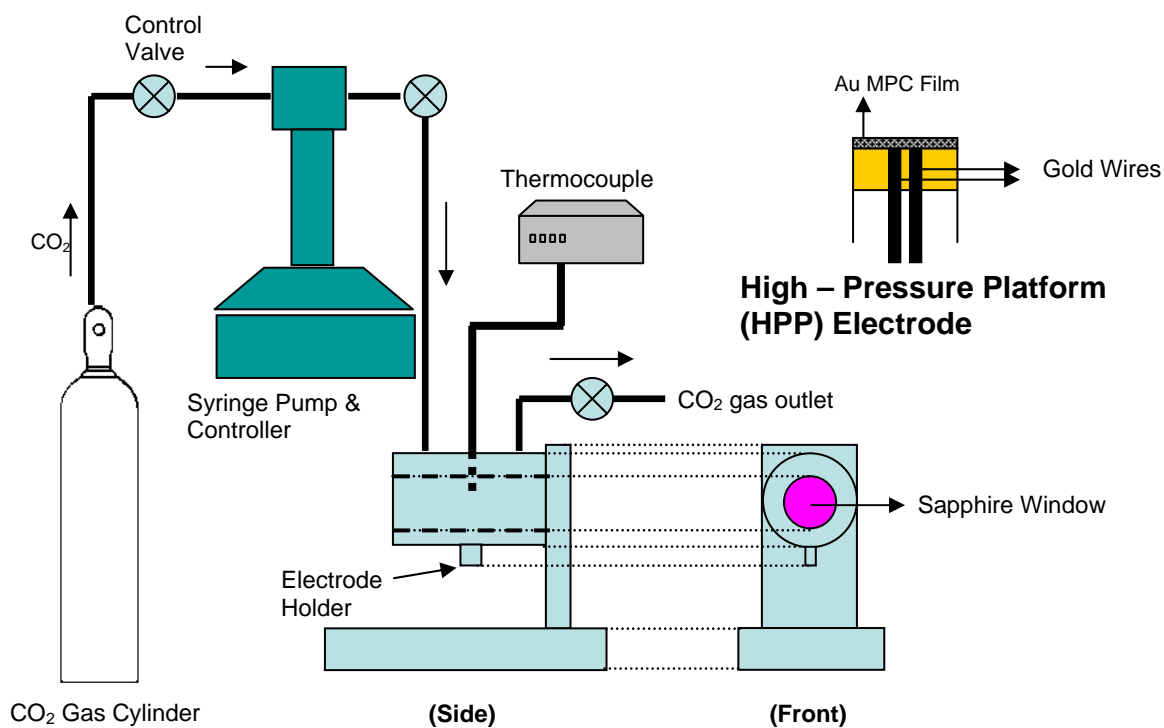

**Figure S-1.** Diagrams of a high-pressure  $\sigma_{EL}$  measurement cell and a high-pressure platform (HPP) electrode.

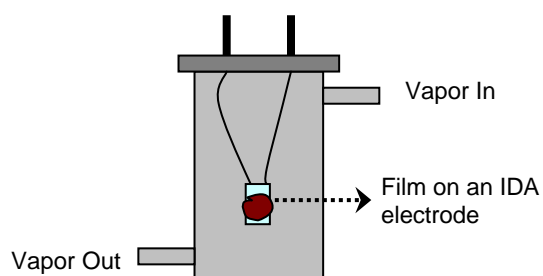

**Figure S-2.** Diagram of a flow cell

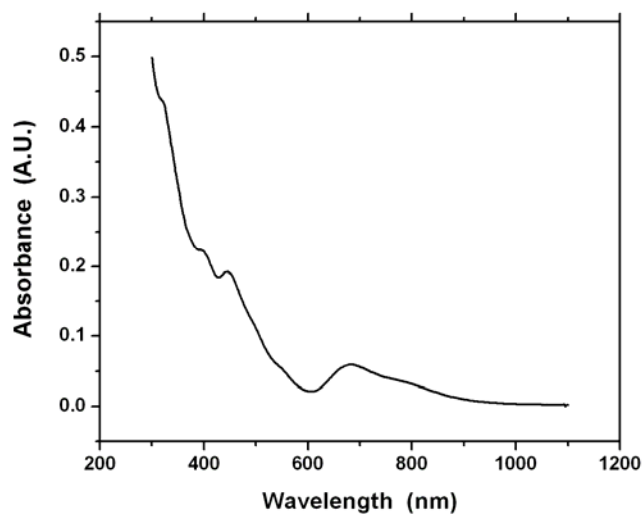

**Figure S-3.** UV-vis spectrum of Au<sub>38</sub> MPCs in CH<sub>2</sub>Cl<sub>2</sub>.

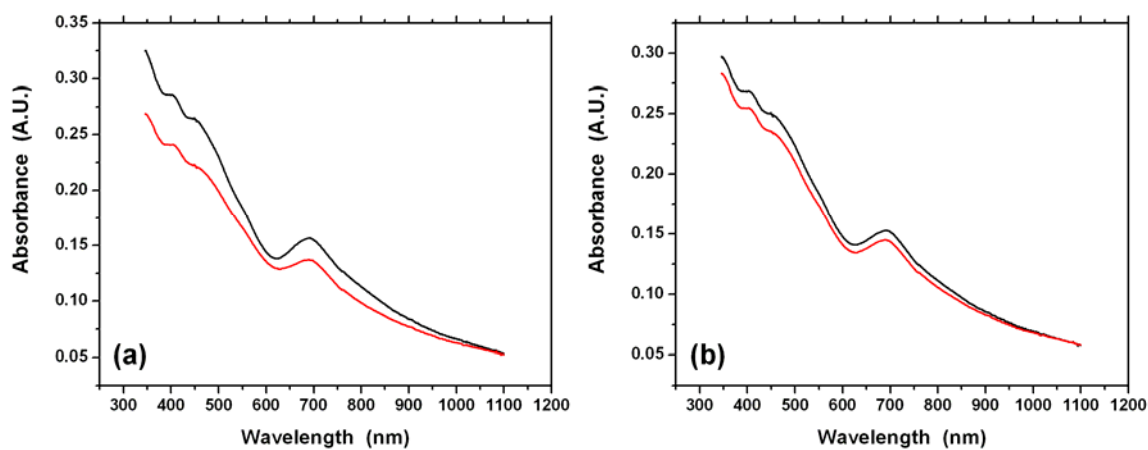

**Figure S-4.** UV-Vis spectra of Au<sub>38</sub> films on glass in (a) ethanol and (b) hexane. In both (a) and (b), black line spectra were measured immediately after the film slide was immersed in liquid solvents (0 min), and red lines were measured after 20 min in liquid solvents.

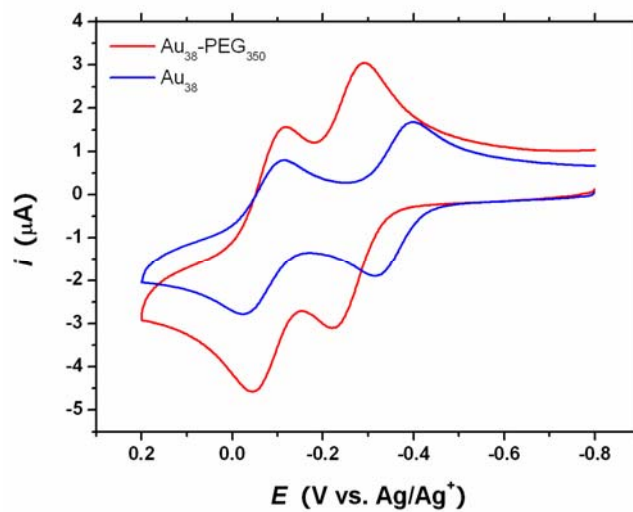

**Figure S-5.** Cyclic voltammograms of  $\text{Au}_{38}$  (5 mg, blue line) and  $\text{Au}_{38}\text{-PEG}_{350}$  (8 mg, red line) measured at the Pt-disk electrode (2 mm diameter) at 100 mV/s. Solvents used for  $\text{Au}_{38}$  and  $\text{Au}_{38}\text{-PEG}_{350}$  MPCs were  $\text{CH}_2\text{Cl}_2$  and  $\text{CH}_3\text{CN}$  (5 mL each), respectively, containing 0.1 M  $\text{Bu}_4\text{N}^+\text{ClO}_4^-$ .
